# Supplementary material for: Public attitudes towards screening for kidney cancer: an online survey
Source: PubMed Central journal article supplement (PMC7592501; doi:10.1186/s12894-020-00724-0), 2020-10-28
Supplement: 12894_2020_724_MOESM1_ESM.pdf [file 12894_2020_724_MOESM1_ESM.pdf]

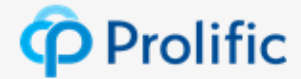

New study available!

Hi NAME,

Jim from Prolific here. We've got a study running right now **"Exploring people's attitudes towards kidney cancer screening"** that needs some more participants, and you're eligible!

We'd love it if you could help out the researcher Juliet Usher-Smith by taking part, and at the same time you can earn a reward of £2.50 for 25 minutes of your time.

[Participate Now](#)

Best,

Jim

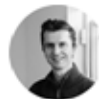

© 2017 Prolific
